# Supplementary material for: Plasmacytoid dendritic cells appear inactive during sub-microscopic Plasmodium falciparum blood-stage infection, yet retain their ability to respond to TLR stimulation
Source: PubMed Central journal article supplement (PMC5453946; doi:10.1038/s41598-017-02096-2), 2017-06-01
Supplement: 41598_2017_2096_MOESM1_ESM.pdf [file 41598_2017_2096_MOESM1_ESM.pdf]

**Plasmacytoid dendritic cells appear inactive during sub-microscopic *Plasmodium falciparum* blood-stage infection, yet retain their ability to respond to TLR stimulation.**

Jessica R. Loughland<sup>1\*</sup>, Gabriela Minigo<sup>1</sup>, Derek S. Sarovich<sup>1,2</sup>, Matt Field<sup>3</sup>, Peta E. Tipping<sup>1€</sup>, Marcela Montes de Oca<sup>4</sup>, Kim A. Piera<sup>1</sup>, Fiona H. Amante<sup>4</sup>, Bridget E. Barber<sup>1,6</sup>, Matthew J. Grigg<sup>1,6</sup>, Timothy William<sup>6,7</sup>, Michael F. Good<sup>8</sup>, Denise L. Doolan<sup>3,4</sup>, Christian R. Engwerda<sup>4</sup>, Nicholas M. Anstey<sup>1,5</sup>, James S. McCarthy<sup>4+</sup>, Tonia Woodberry<sup>1+</sup>.

<sup>1</sup>Menzies School of Health Research, Darwin, Australia and Charles Darwin University, Darwin, Australia; <sup>2</sup>Centre for Animal Health Innovation, Faculty of Science, Health, Education and Engineering, University of the Sunshine Coast, Sippy Downs, Queensland, Australia; <sup>3</sup>Australian Institute of Tropical Health and Medicine, James Cook University, Cairns, Australia; <sup>4</sup>QIMR Berghofer Medical Research Institute, Brisbane, Australia; <sup>5</sup>Royal Darwin Hospital, Darwin, Australia; <sup>6</sup>Infectious Diseases Unit, Queen Elizabeth Hospital, Kota Kinabalu, Sabah, Malaysia; <sup>7</sup>Sabah Department of Health, Kota Kinabalu, Sabah, Malaysia; <sup>8</sup>Griffith University, Gold Coast, Australia.

\* [jessica.loughland@menzies.edu.au](mailto:jessica.loughland@menzies.edu.au)

+ These authors contributed equally to this work.

€ Present Address: Royal Darwin Hospital, Darwin, Australia.

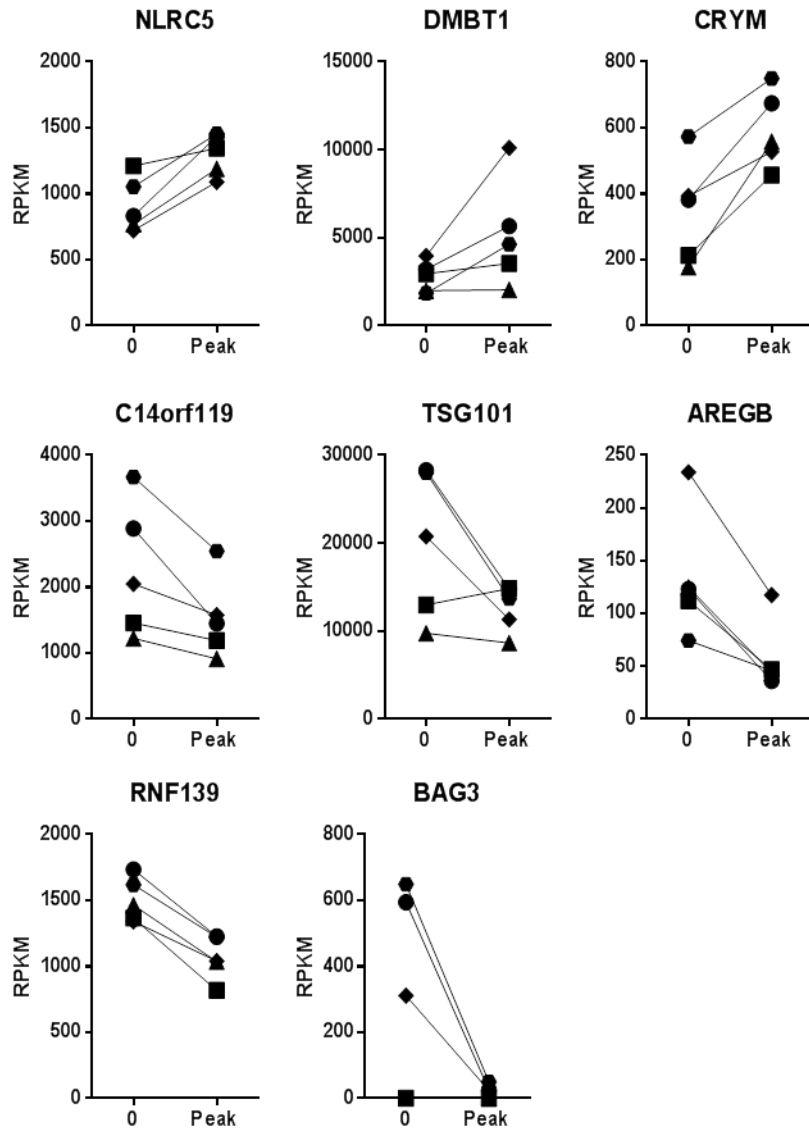

**Supplementary Figure 1 Summary of differential gene expression.** Longitudinal pDC gene expression changes in five participants, between day 0 and peak parasitemia (day 7-8). Represented genes had an FDR<0.07, each symbol represents one participant.
